# Supplementary material for: ‘Clickable’ 2,5-diketopiperazines as scaffolds for ligation of biomolecules: their use in Aβ inhibitor assembly
Source: Royal Society of Chemistry journal article supplement (doi:10.1039/c4ob00541d), 2014-01-01
Supplement: c4ob00541d1.pdf [file c4ob00541d1.pdf]

# Supporting Information

For

## ‘Clickable’ 2,5-diketopiperazines as scaffolds for ligation of biomolecules: use in A $\beta$ inhibitor’s assembly

E. Dufour, L. Moni, L. Bonnat, S. Chierici\*, and J. Garcia

\*Corresponding Author: Dr. S. Chierici, Département de Chimie Moléculaire, CNRS UMR 5250, ICMG FR 2607, Equipe I2BM, Université Joseph Fourier, 570 rue de la Chimie, BP 53, 38041 Grenoble cedex 09, France; **Email:** [sabine.chierici@ujf-grenoble.fr](mailto:sabine.chierici@ujf-grenoble.fr)

### Table of Contents

|                                                                                                     |           |
|-----------------------------------------------------------------------------------------------------|-----------|
| <b>S1. Kinetic studies of A<math>\beta</math><sub>40</sub> fibril formation in presence of DKPs</b> |           |
| <b>S2. Copies of NMR spectra</b>                                                                    | <b>5</b>  |
| <b>S3. Copies of MS and HRMS spectra</b>                                                            | <b>15</b> |

## S1. Kinetic studies of A $\beta$ <sub>40</sub> fibril formation in presence of DKPs

### Materials and methods

We used for the kinetic assays the same materials and conditions as we have previously described (G. T. Dolphin, S. Chierici, M. Ouberaï, P. Dumy and J. Garcia, *ChemBioChem*, 2008, **9**, 952. These conditions are mentioned below.

*Preparation of synthetic A $\beta$ <sub>40</sub> peptide:* A $\beta$ <sub>40</sub> was synthesized on an Applied Biosystems 433A peptide synthesizer using Fmoc-Val-Novasyn-TGA resin (loading 0.24 mmol/g). The peptide was assembled using standard solid phase methods but coupling reaction times of 60 min were used and difficult residues were coupled twice. Removal of protecting groups and cleavage from the resin were carried out with a mixture of TFA/TIS/H<sub>2</sub>O/EDT (94:2:2:2), with swirling for 2 h. After filtration, TFA was removed under *vacuum* and the peptide was precipitated in Et<sub>2</sub>O. A $\beta$ <sub>40</sub> peptide was obtained after purification by RP-HPLC (C5, 214 nm, 10-90% B in 30 min) and lyophilization, and was stored at -20 °C. RP-HPLC (C18, 214 nm, 5-100% solvent B in 20 min)  $t_R$  = 12 min. ESI-MS calcd 4328, found 4329.7.

*Preparation of inhibitor stock solutions:* Inhibitors were dissolved in DMSO/H<sub>2</sub>O (1/1). Stock solutions at 5 mM were first prepared, thereafter they were diluted with DMSO/H<sub>2</sub>O (1/1) to afford a concentration range of 2.5 mM to 0.5  $\mu$ M. Final concentrations of DMSO in inhibition studies were less than 2%.

*Aggregation measurement of A $\beta$ <sub>40</sub>:* A solution of A $\beta$ <sub>40</sub> was prepared as follows: 2.7 mg were dissolved in 200  $\mu$ L of 1,1,1,3,3,3-hexafluoro-2-propanol to disassemble preformed aggregates, thereafter it was lyophilized. One mL of pure water was added to the lyophilized peptide and the solution was centrifuged at 12 000 g to remove eventual aggregates. The concentration of A $\beta$ <sub>40</sub> was 500  $\mu$ M. Aggregation of A $\beta$ <sub>40</sub> was performed in 96-well black polypropylene microplates (Sterilin). To each well an aliquot of the A $\beta$ <sub>40</sub> peptide solution was mixed into the aggregation buffer giving a final composition of A $\beta$ <sub>40</sub> (50  $\mu$ M) and ThT (10  $\mu$ M) in sodium phosphate (50 mM) and NaCl (100 mM) pH 7.4. Aliquots of 2  $\mu$ L of the inhibitor compounds were added, giving the aggregation mixture a total volume of 100  $\mu$ L. The microplates were sealed with a plastic sheet and incubated at 37 °C. The ThT fluorescence intensity was recorded once or twice daily using bandpass filters of 445 nm for excitation and 485 nm for emission, and a cutoff filter of 475 nm, using a Molecular Devices Spectra MAX Gemini XS microplate reader. The data are the result of three experiments. Kinetic data were fitted with the stretched exponential function:  $F(t)=F(\infty)-\Delta F\exp(-(kt)^n)$ , where  $F(t)$  is the fluorescence at time  $t$ ,  $F(\infty)$  is the fluorescence after complete fibril formation,  $\Delta F$  is the difference in fluorescence between  $t(0)$  and  $t(\infty)$ ,  $k$  is the rate constant, and values larger than 1 for the parameter  $n$  indicate a sigmoidal transition with an initial lag-phase.

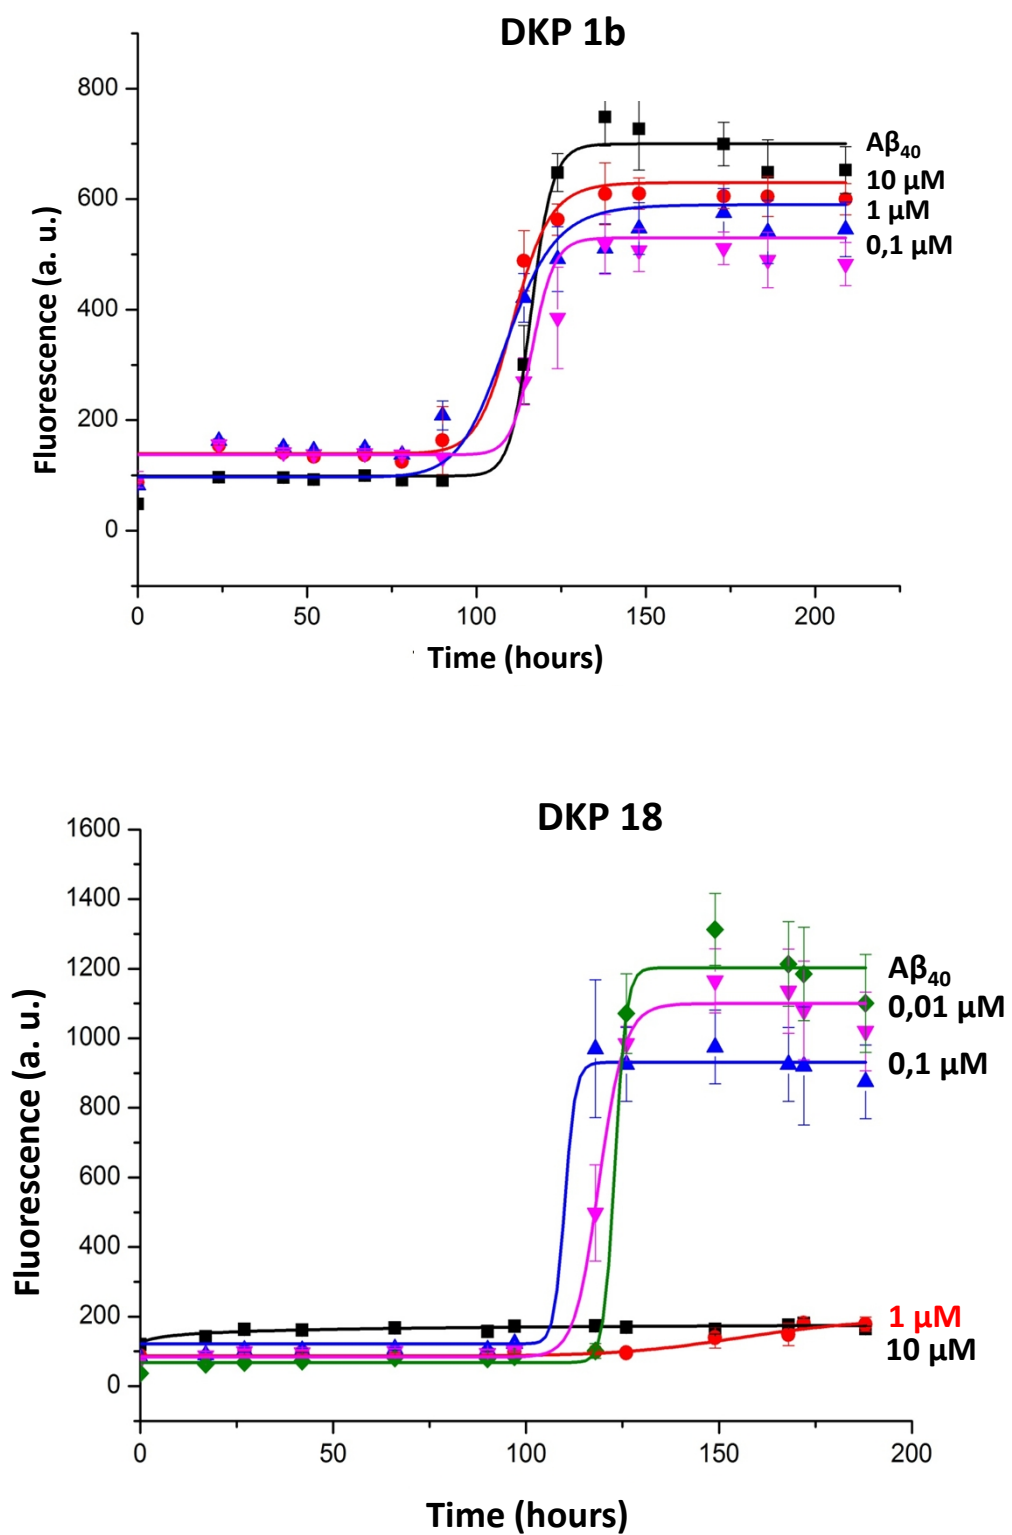

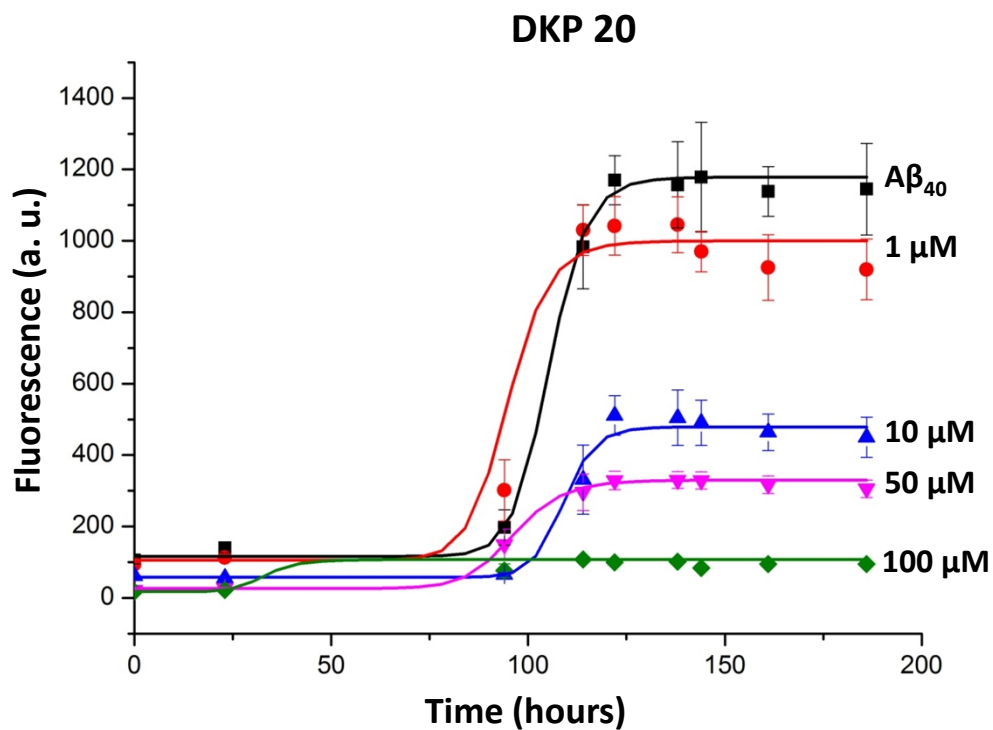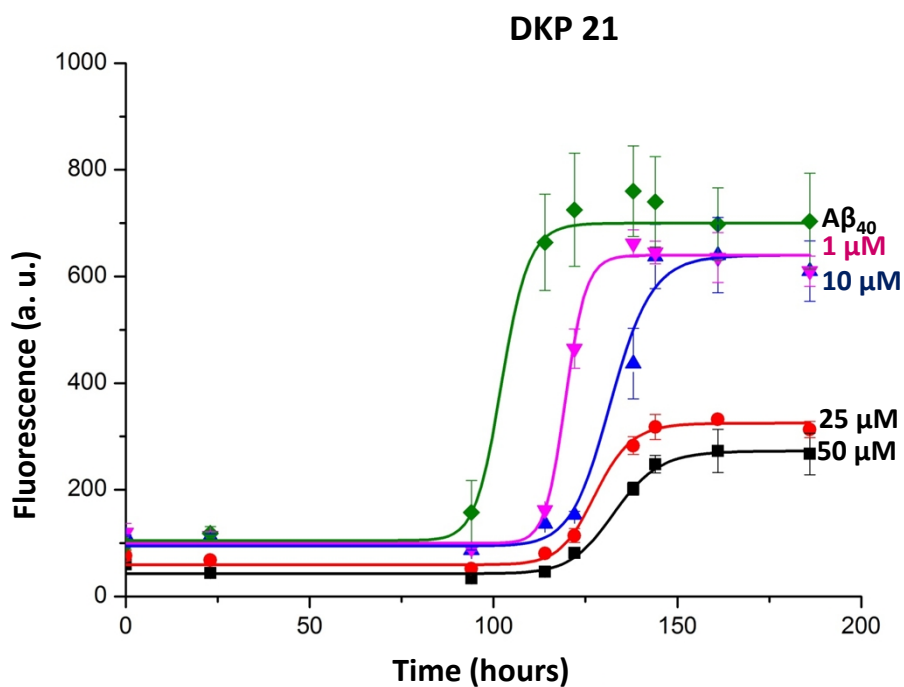

## S2. Copies of NMR spectra

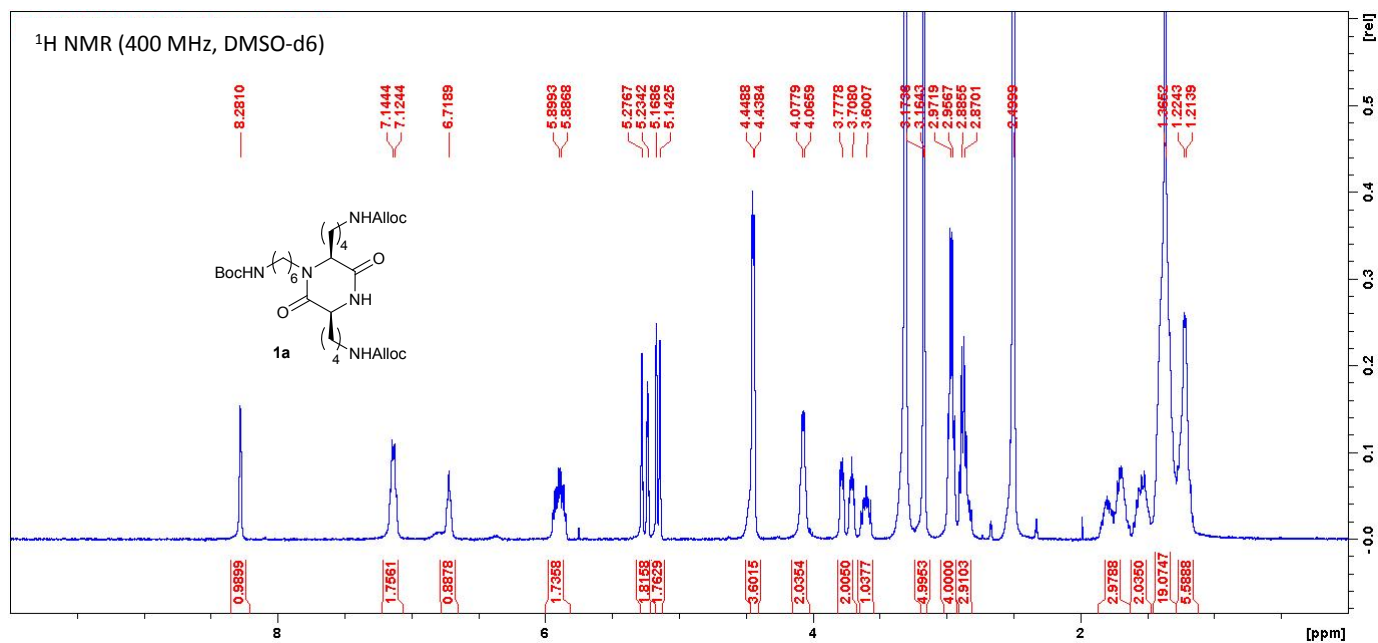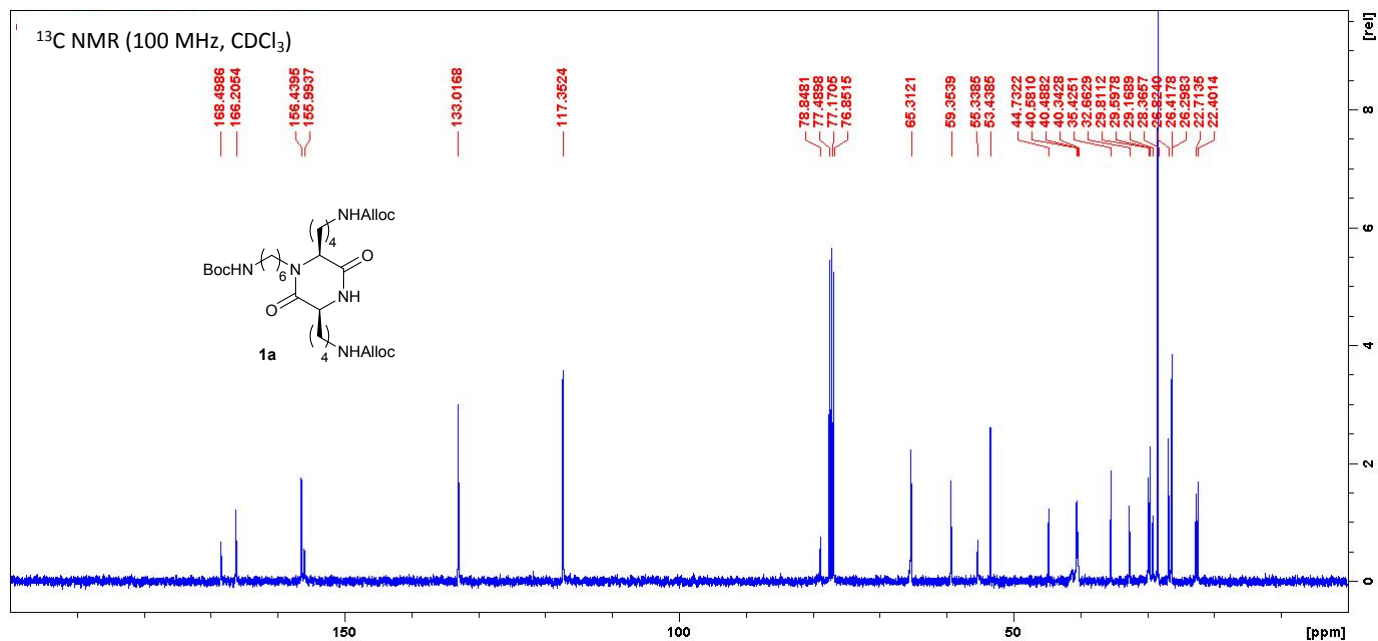

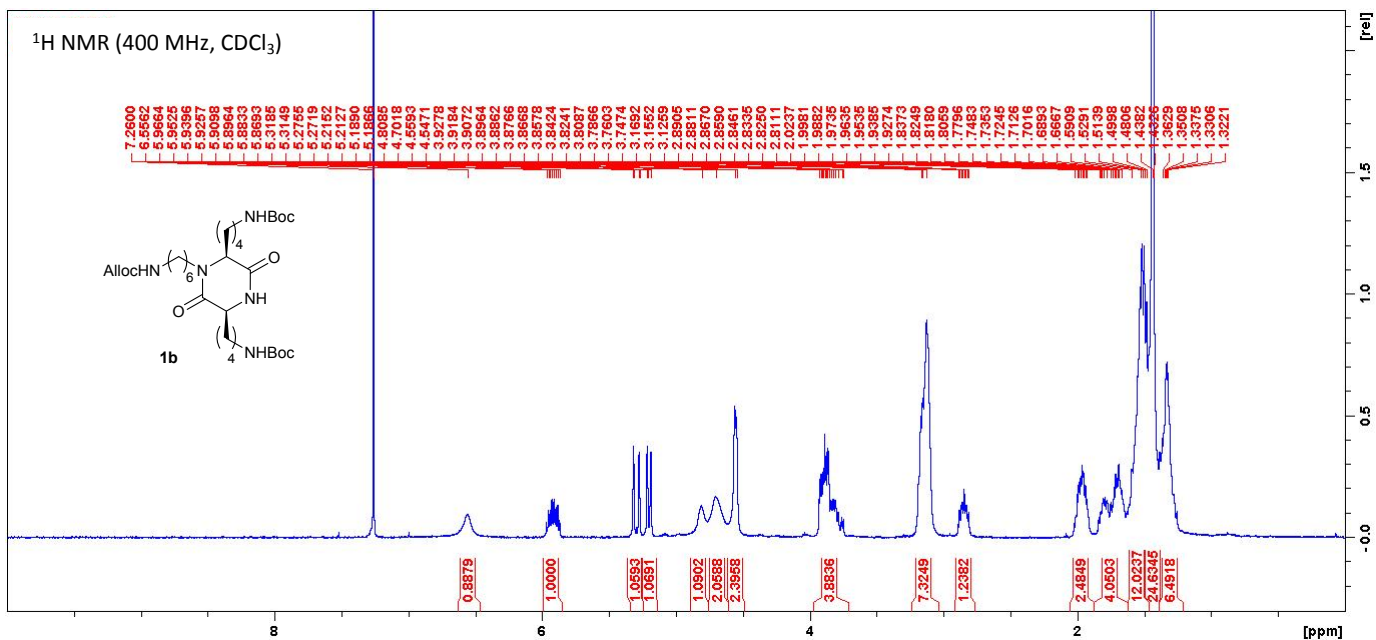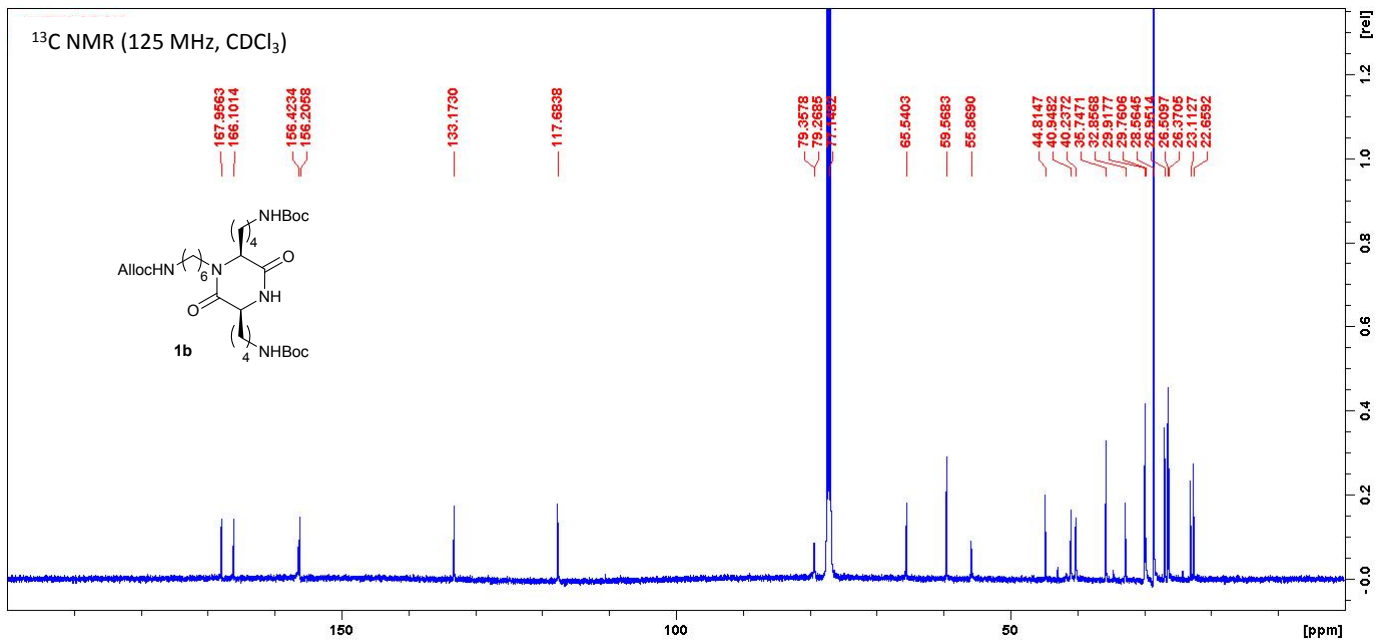

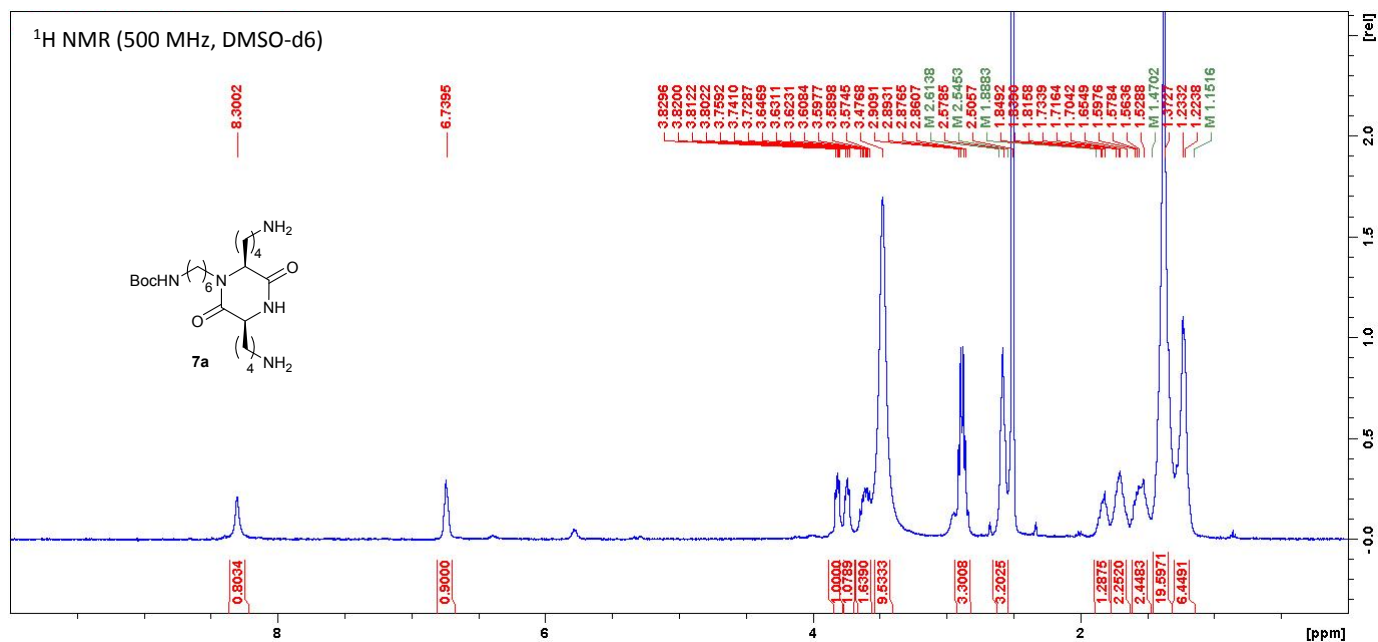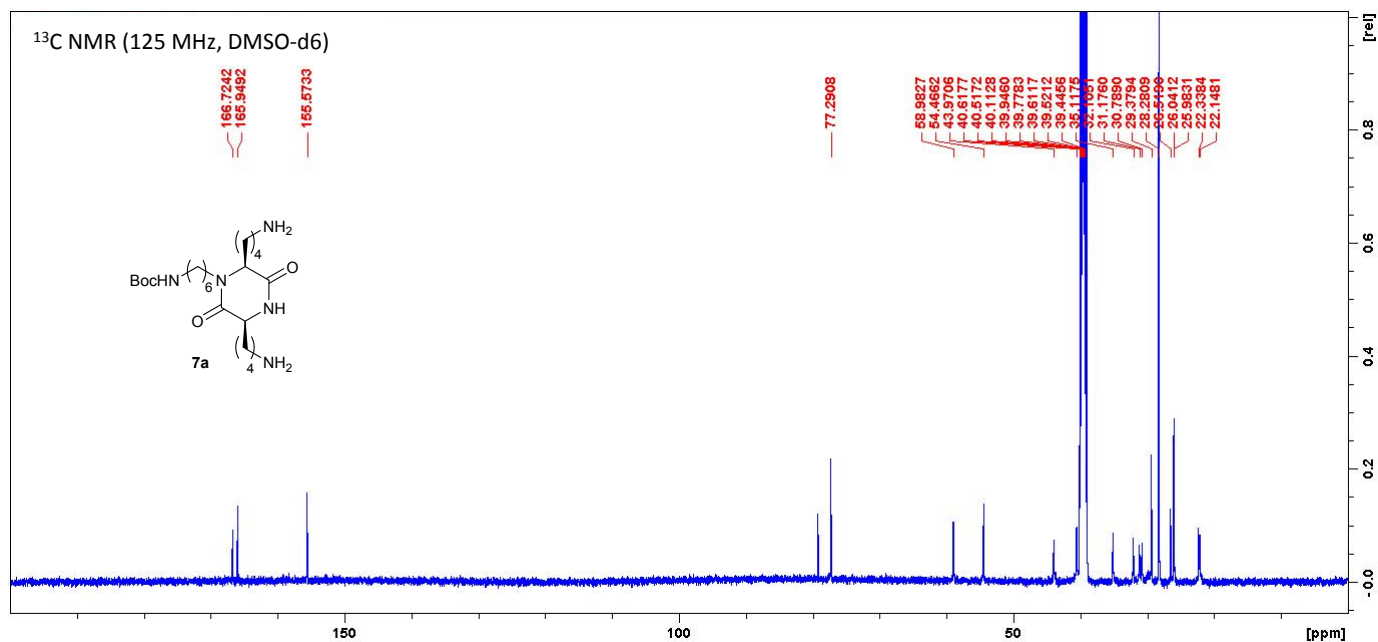

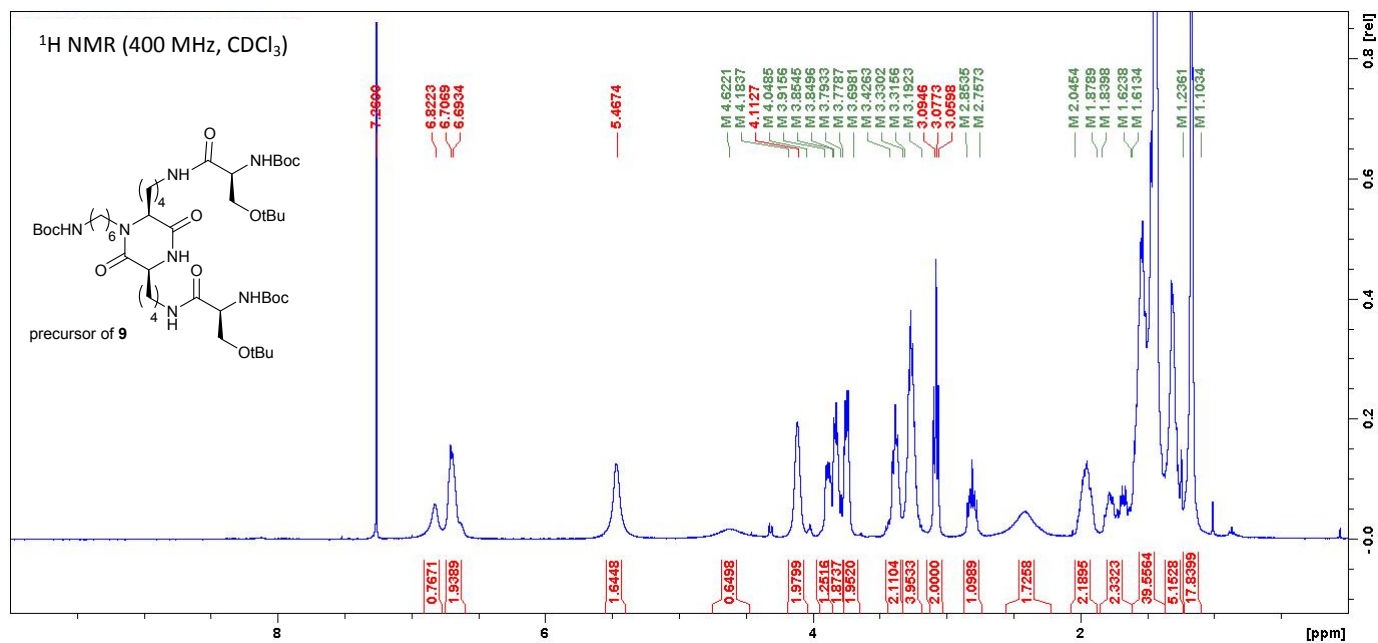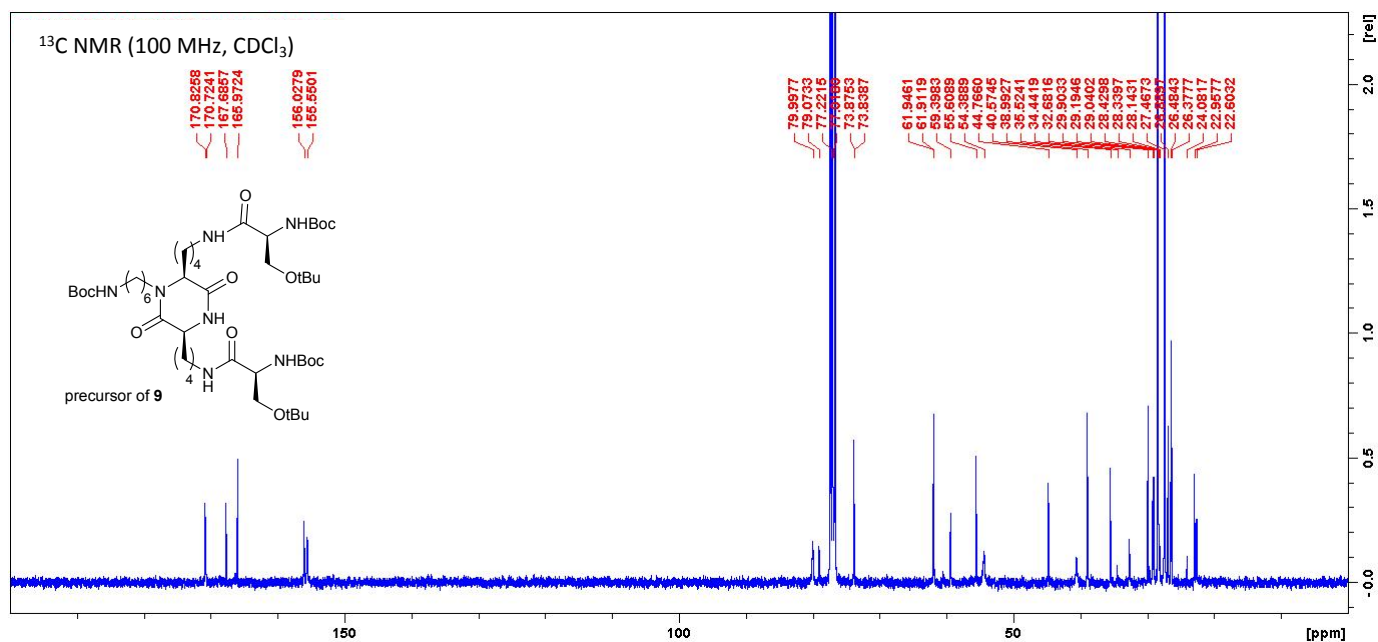



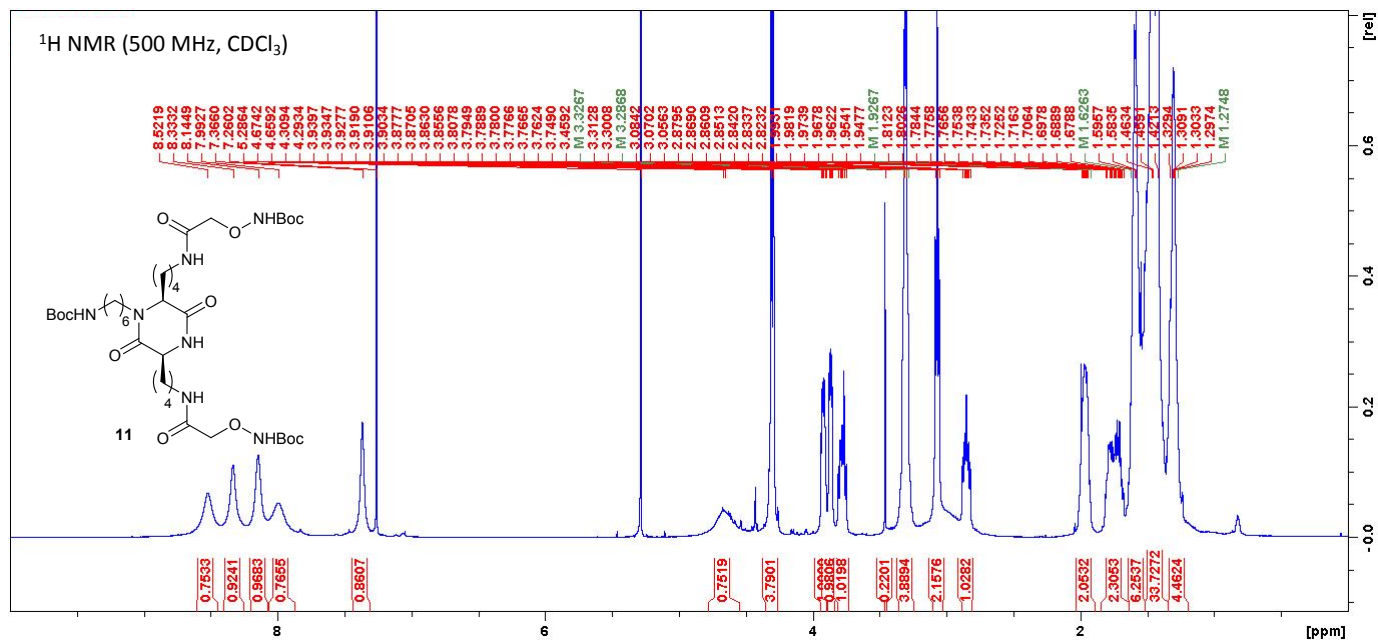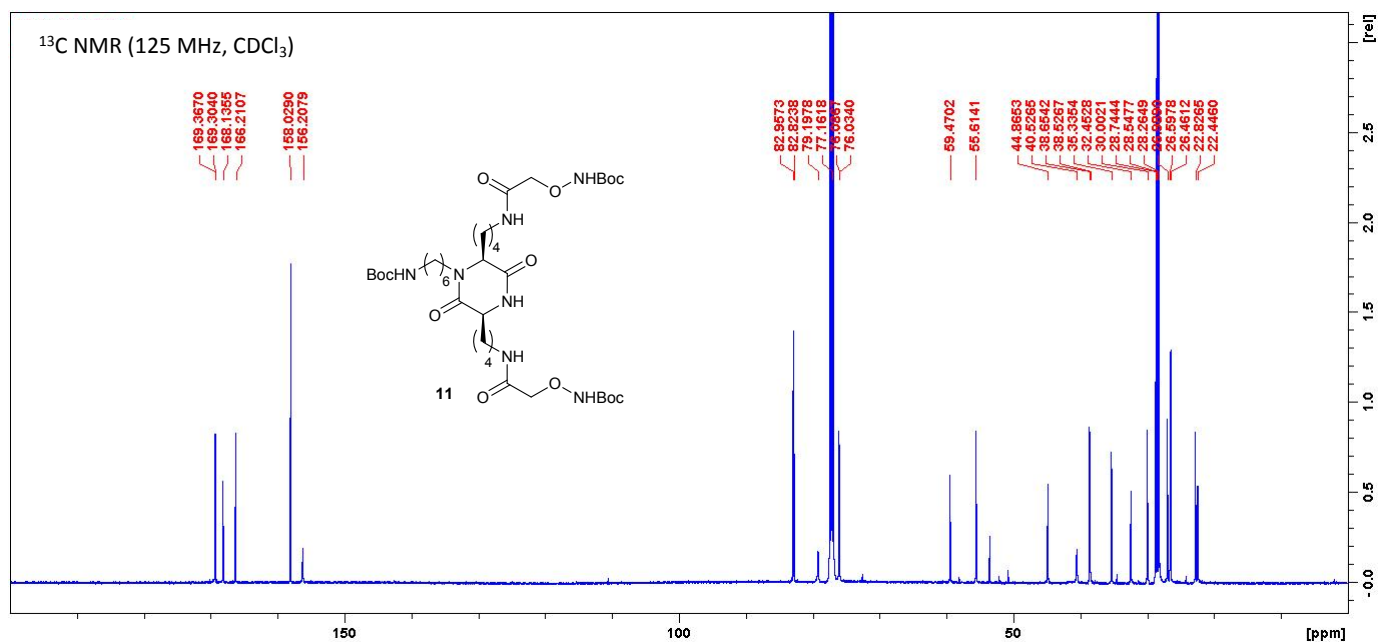

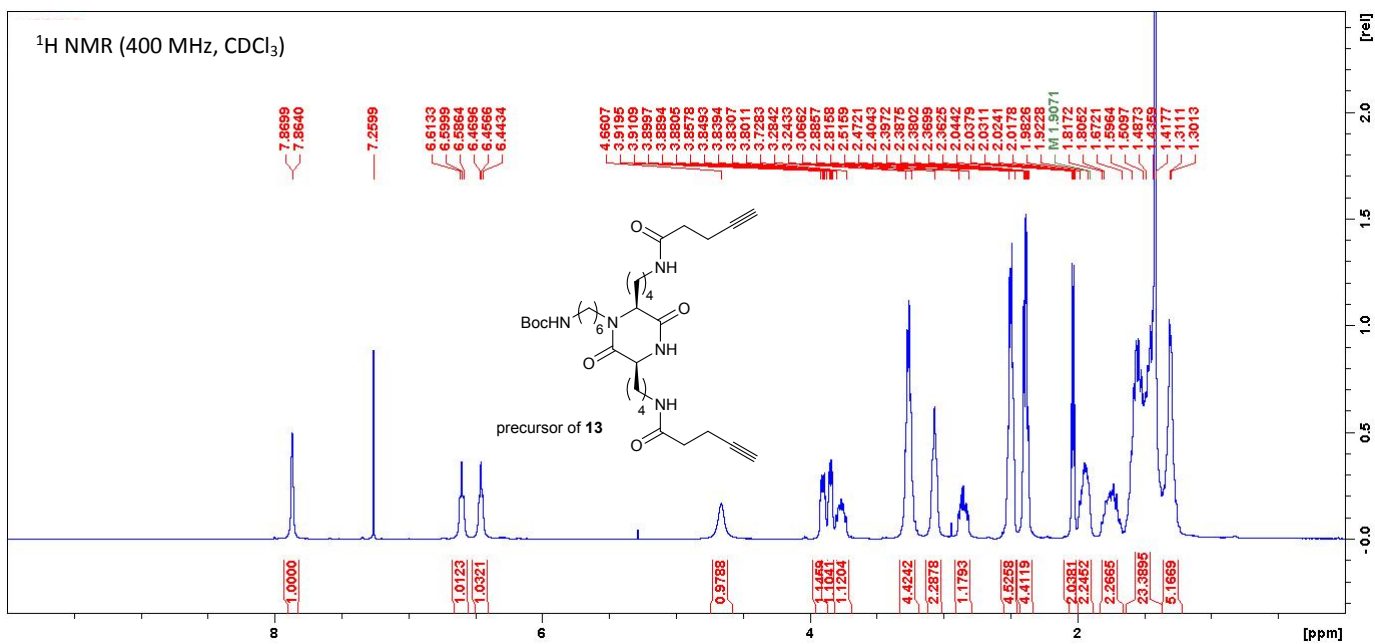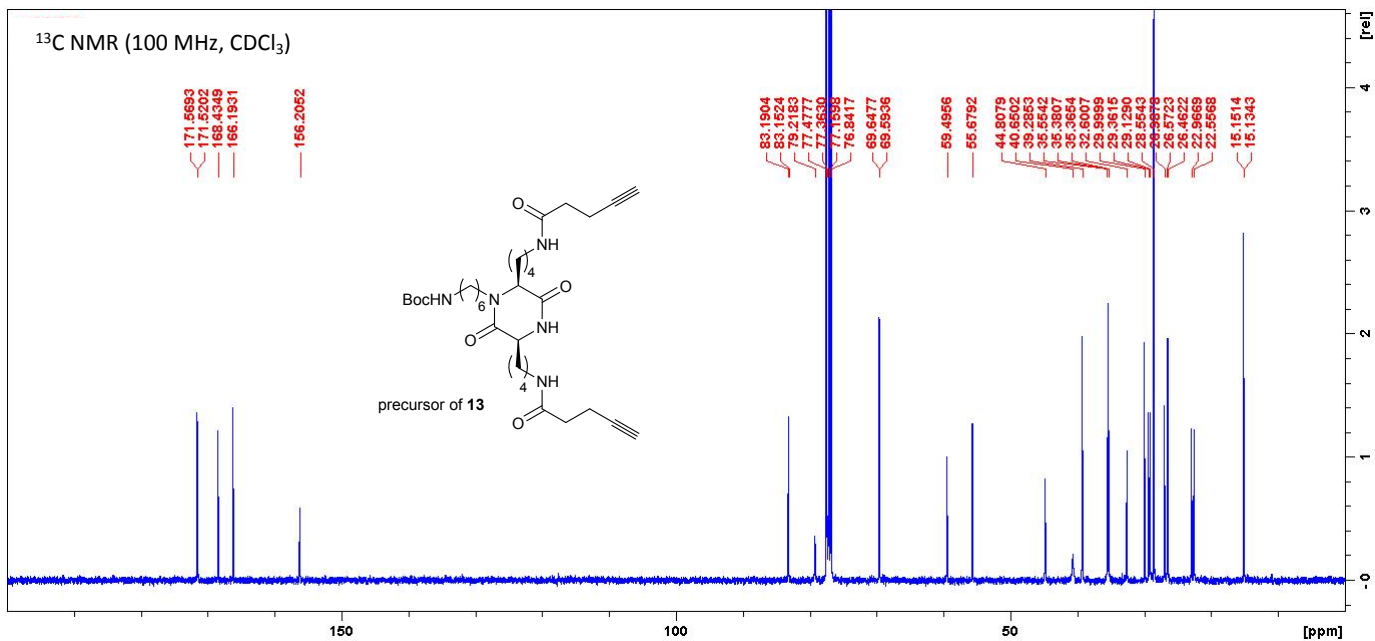

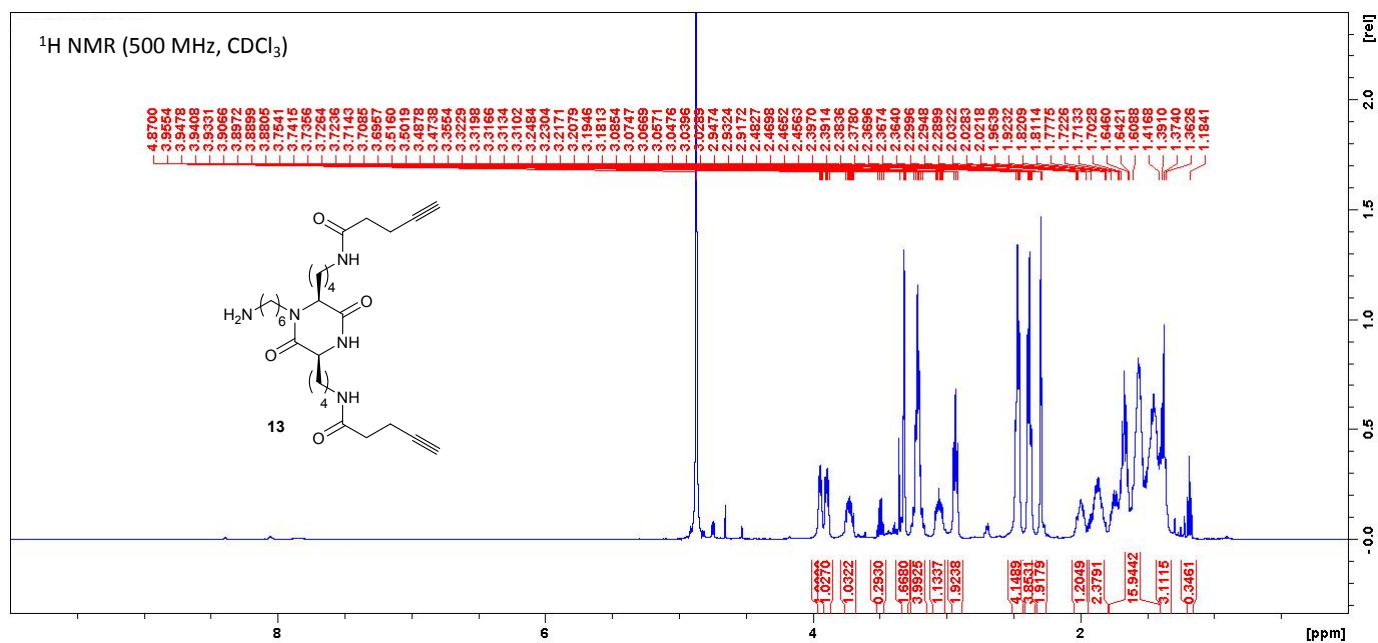

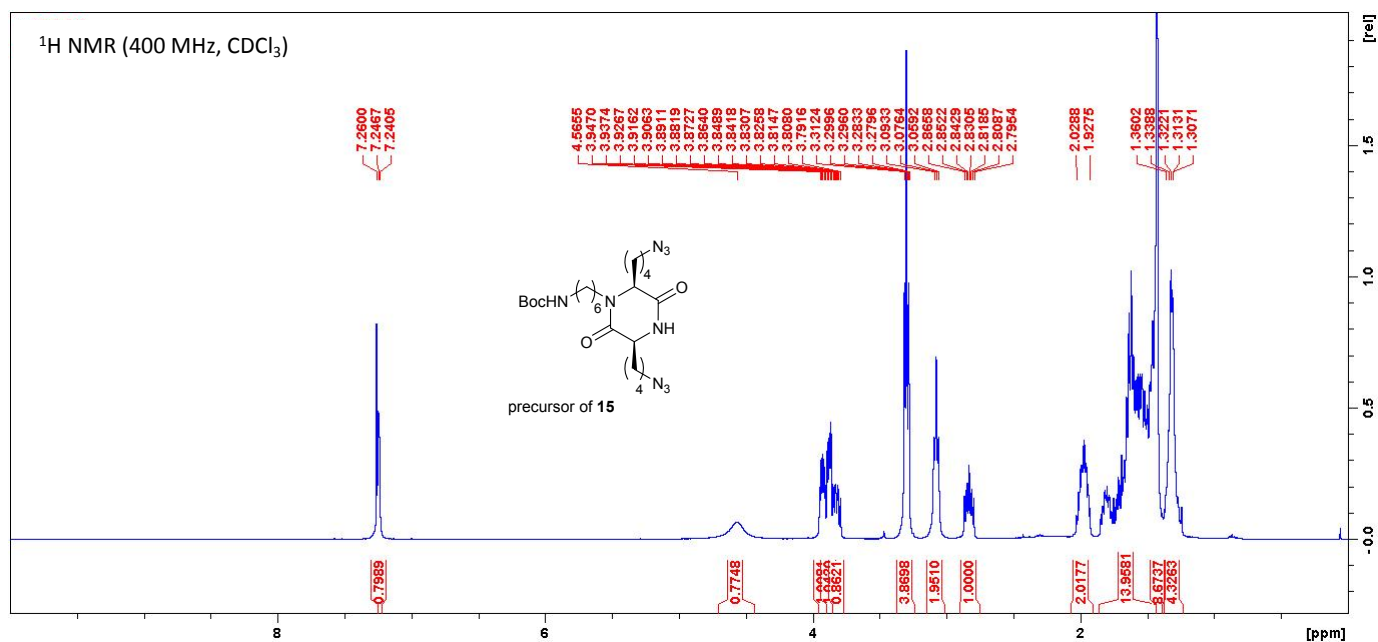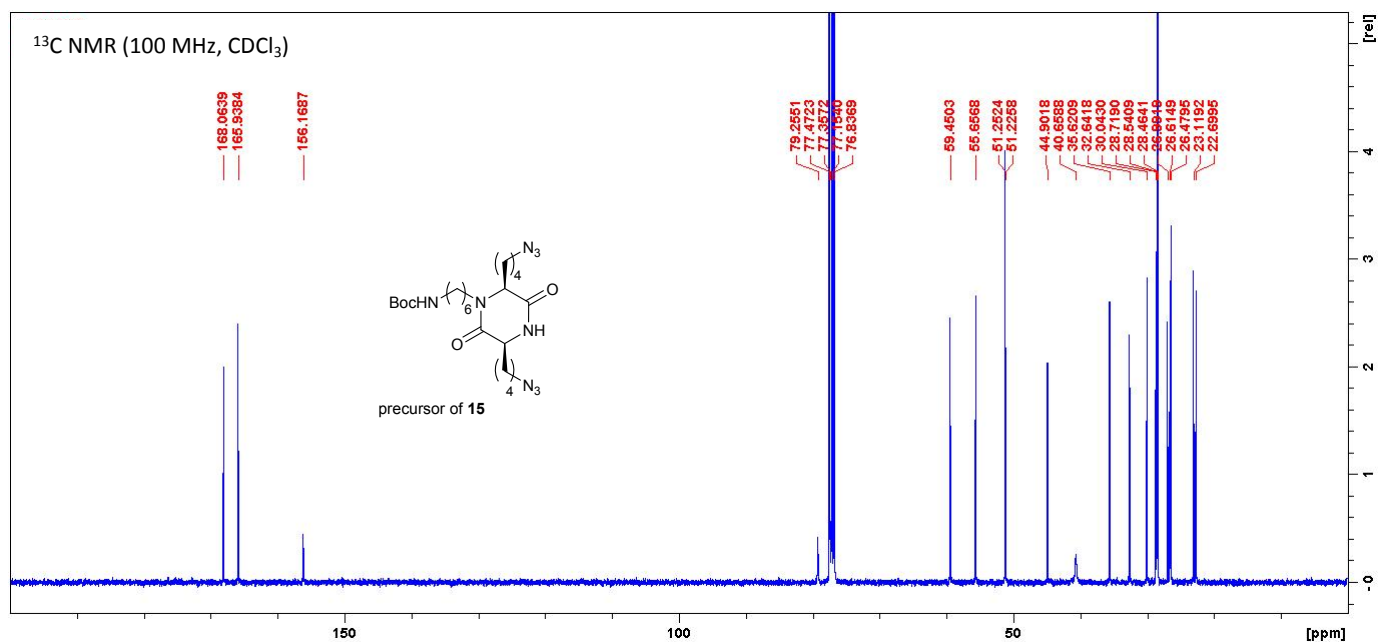

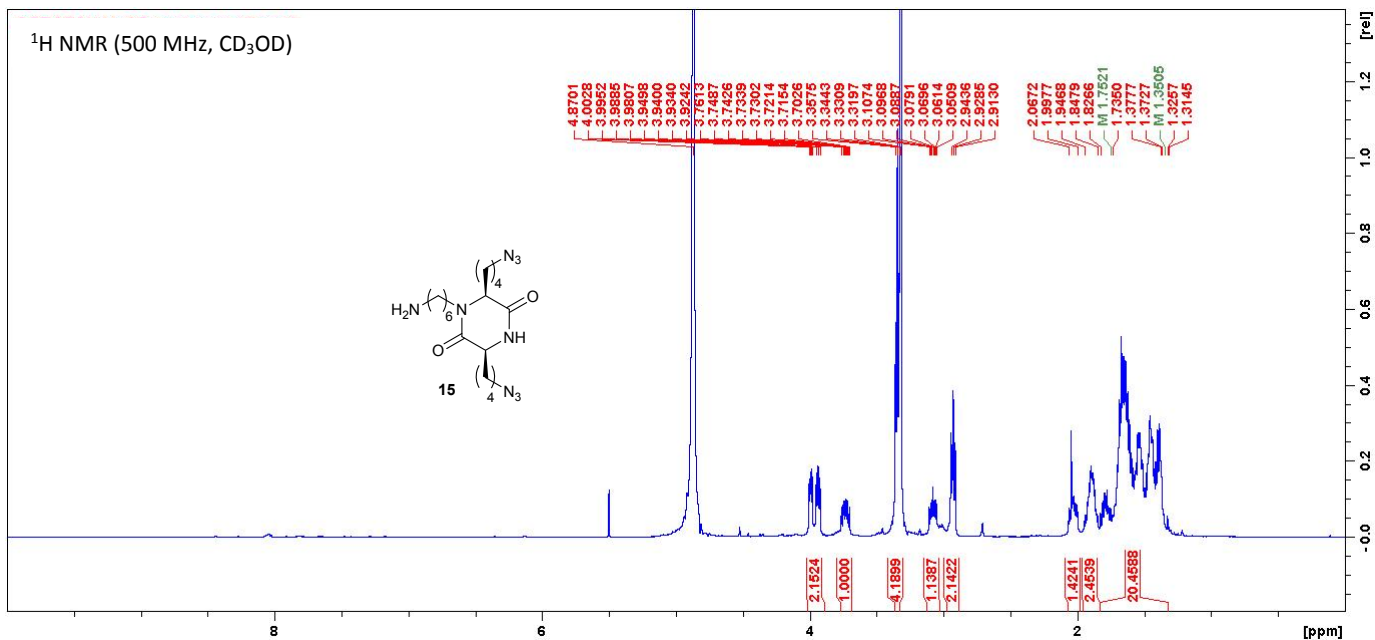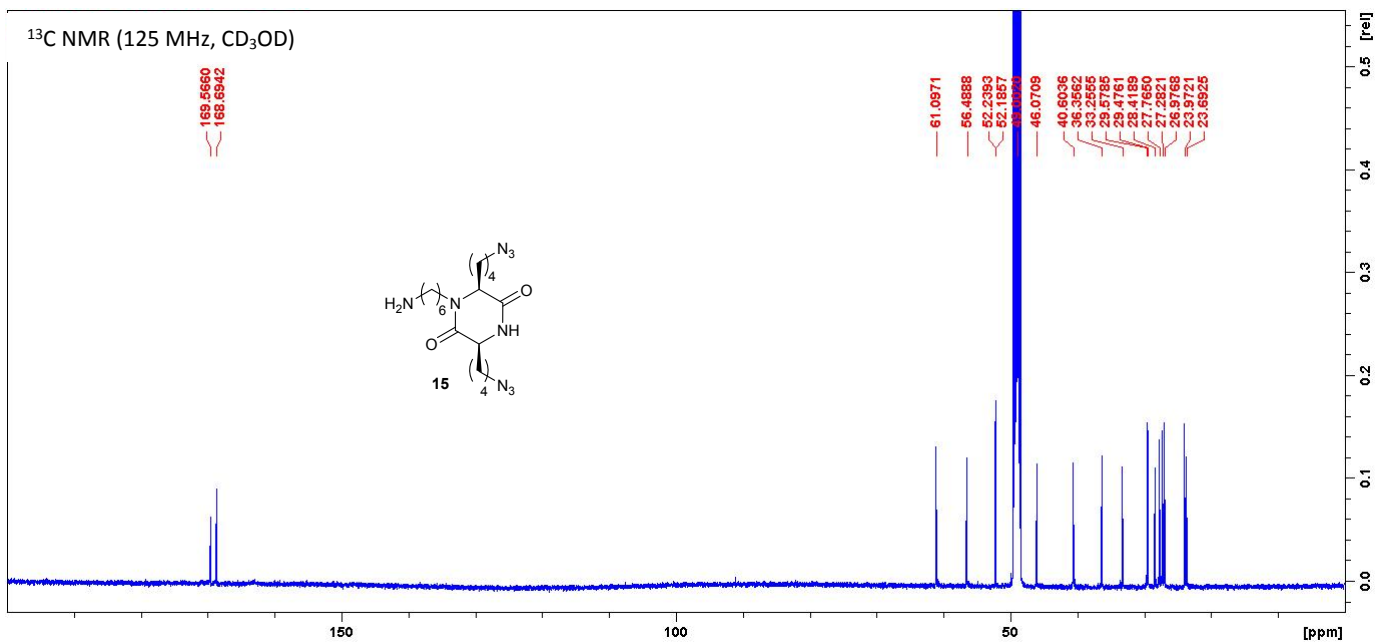

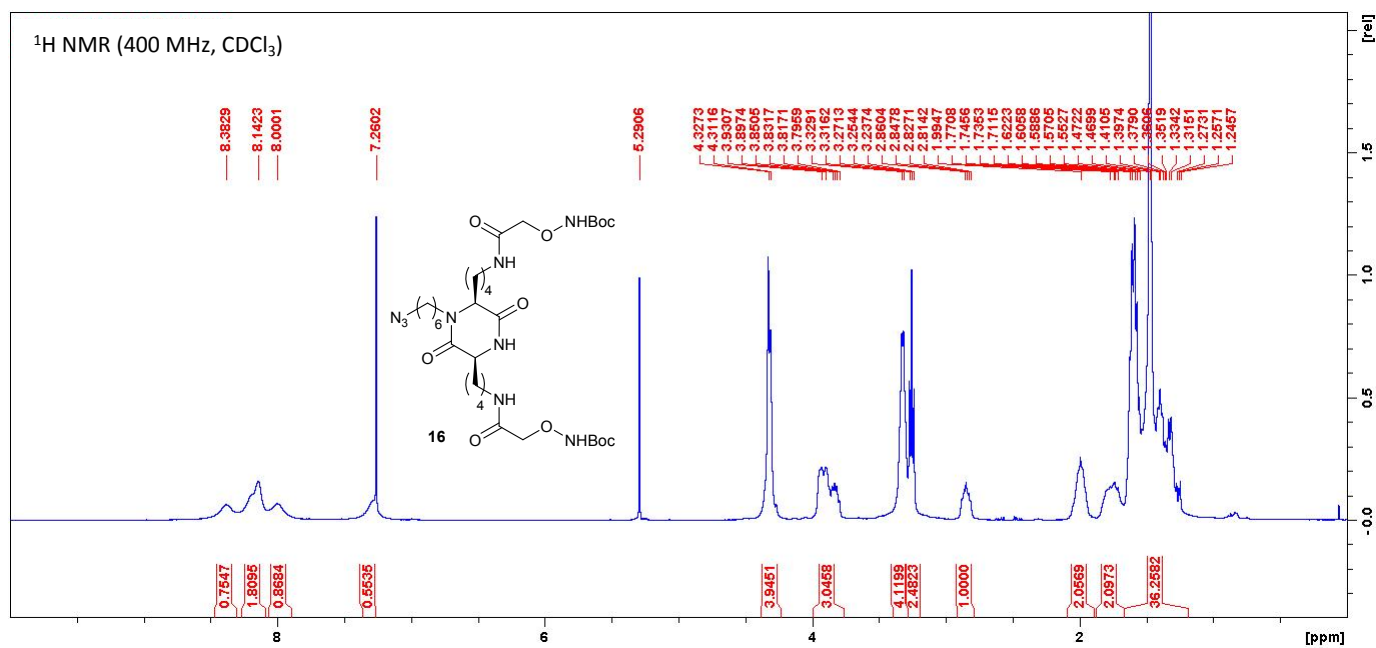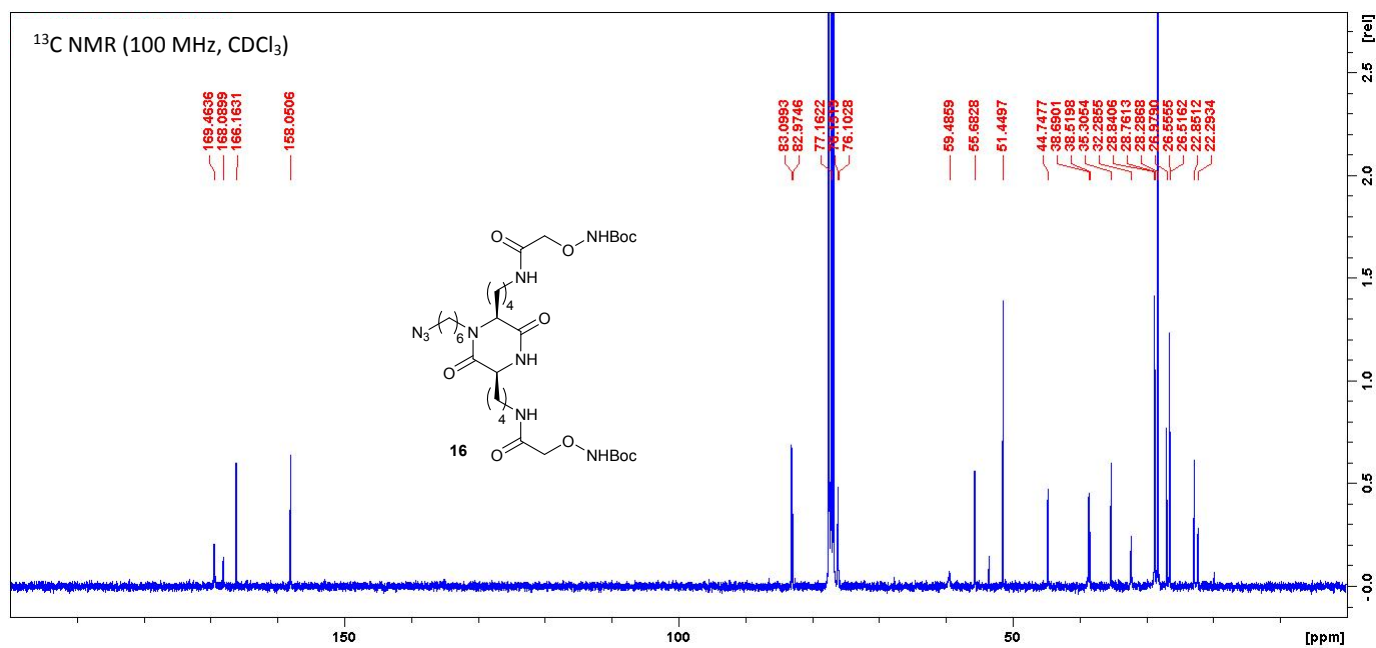

### S3. Copies of MS and HRMS spectra

Compound 17, HRMS (ESI)

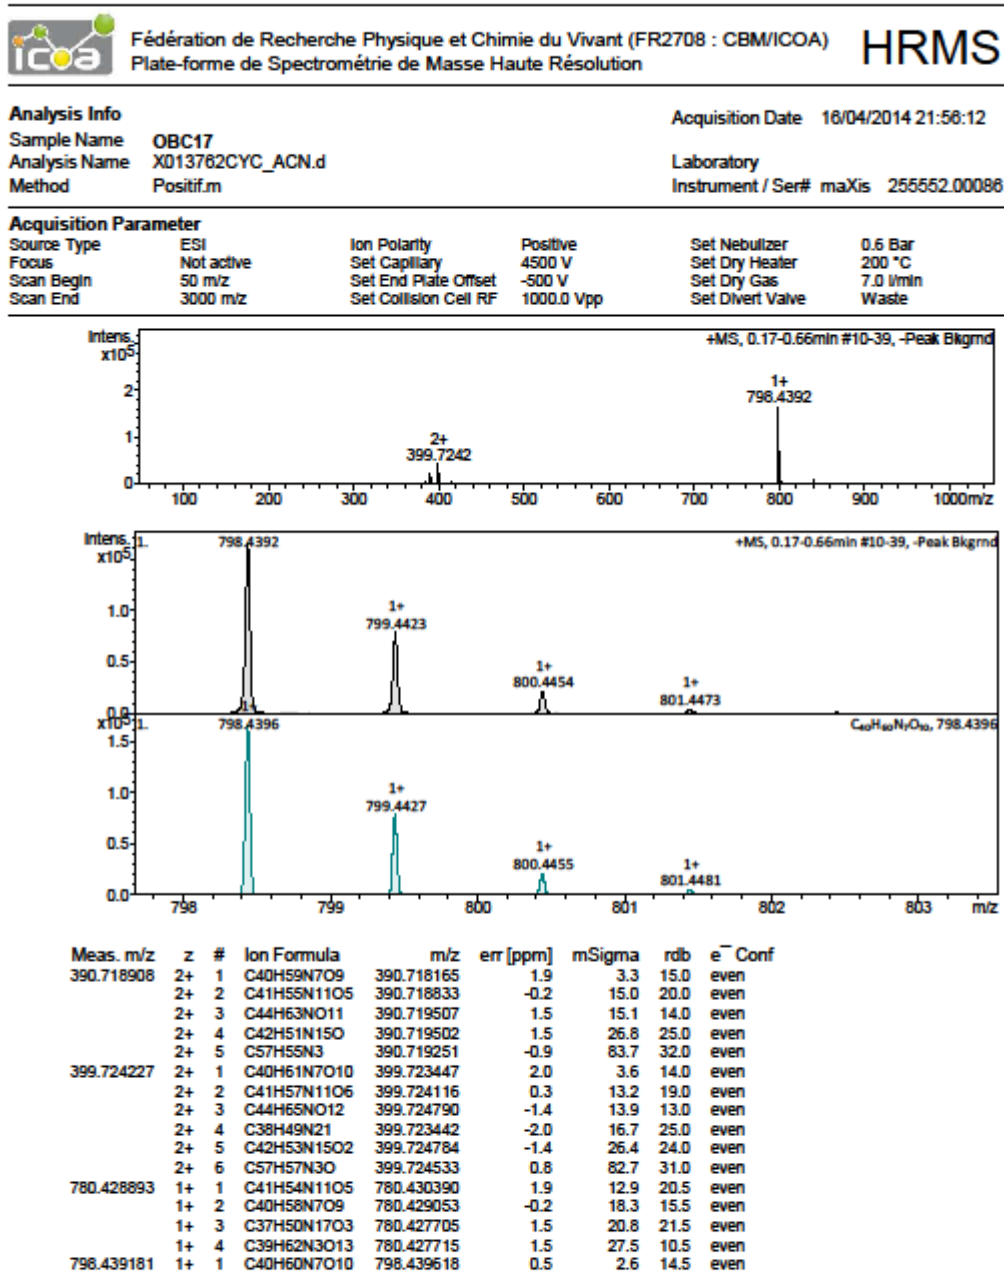

Institut de Chimie Organique et Analytique  
UMR 7311 - Université d'Orléans - CNRS  
BP 6759 - rue de Chartres - F-45067 ORLEANS Cedex 2

printed: 16/04/2014 23:12:03  
Page 1 of 2

cyril.colas@univ-orleans.fr  
+33 (0)2 38 49 46 61



Compound **17**, Mass spectra (ESI)

Display Report

Analysis Info

Analysis Name D:\Data\I2BME\_14105\_12.d  
Method peptide\_mw\_1800\_2500.m  
Sample Name chierici  
Comment OBC17(779)  
dilue 1/100 eau/acn/hcooh

Acquisition Date 4/15/2014 4:54:23 PM

Operator Rodolphe  
Instrument esquire3000 plus

Acquisition Parameter

|                   |              |              |            |                          |          |
|-------------------|--------------|--------------|------------|--------------------------|----------|
| Ion Source Type   | ESI          | Ion Polarity | Positive   | Alternating Ion Polarity | off      |
| Mass Range Mode   | Std/Enhanced | Scan Begin   | 150 m/z    | Scan End                 | 1000 m/z |
| Capillary Exit    | 136.0 Volt   | Skim 1       | 40.0 Volt  | Trap Drive               | 83.1     |
| Accumulation Time | 511 $\mu$ s  | Averages     | 20 Spectra | Auto MS/MS               | off      |

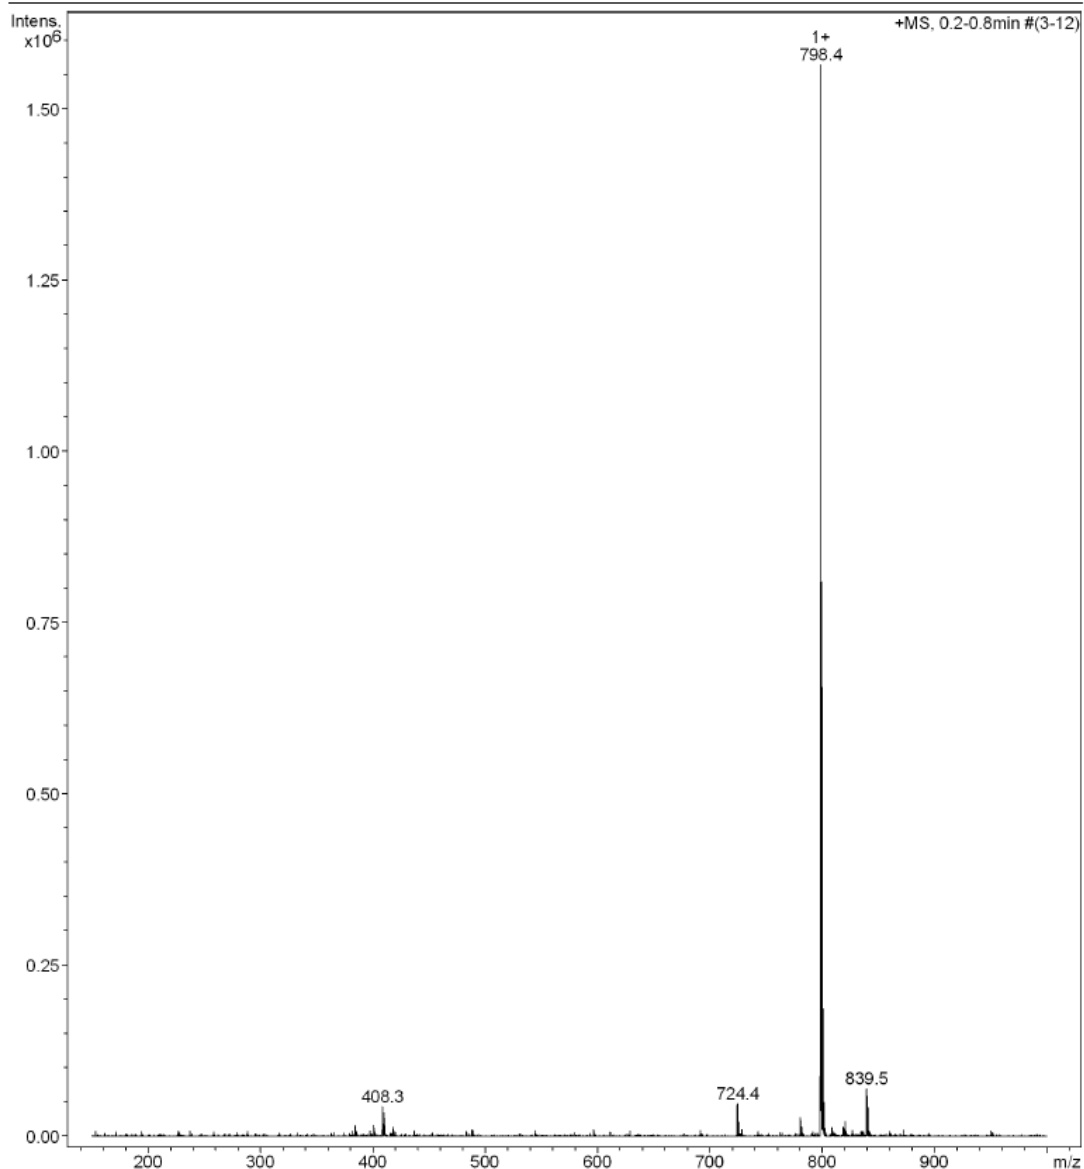



Compound **18**, HRMS (ESI)

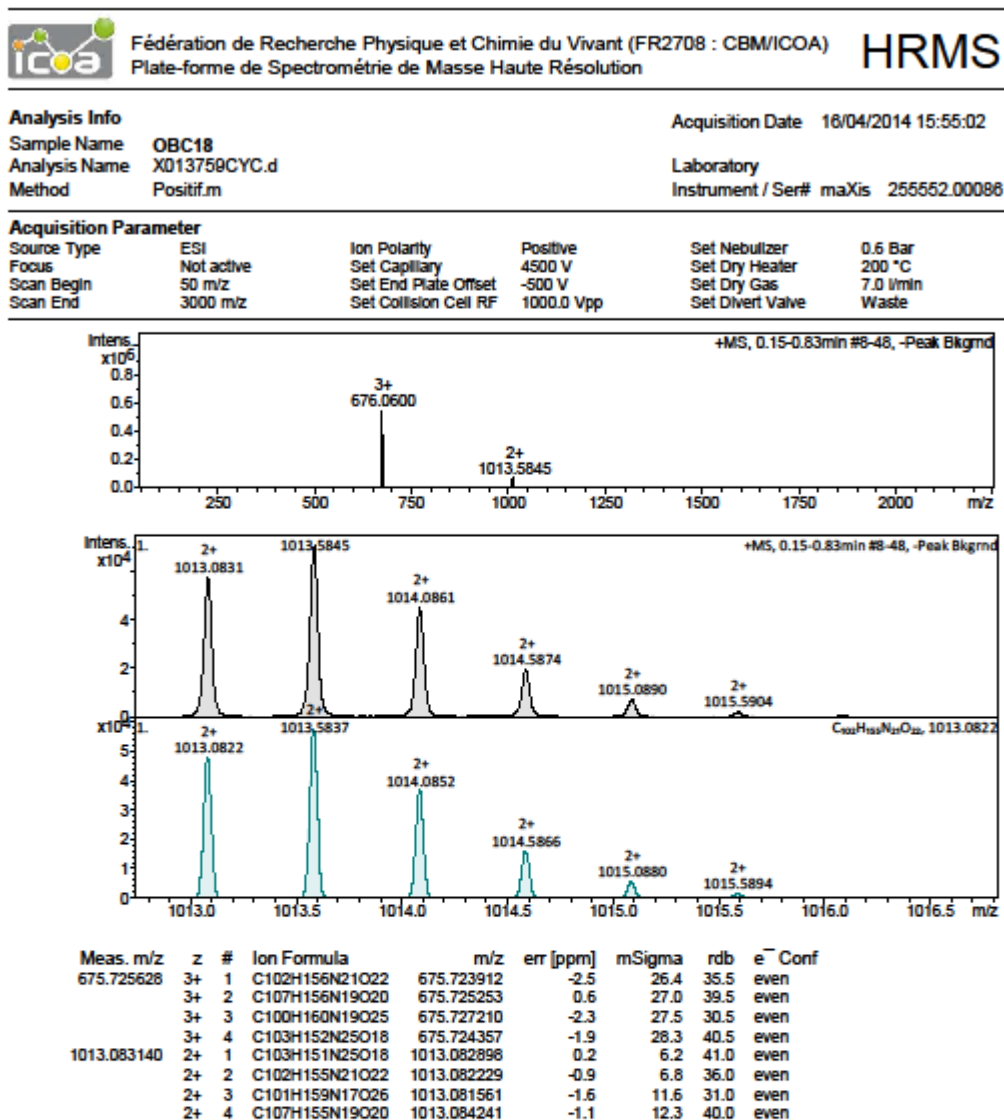

Compound **18**, Mass spectra (ESI)

## Mass Spectrum Deconvolution Report

### Analysis Info

Analysis Name D:\Data\I2BM\ED\_111213\_02.d  
Method Standby.m  
Sample Name emilie dufour  
Comment edufB39 tr=15.9

Acquisition Date 12/13/2011 7:14:50 PM

Operator Rodolphe  
Instrument esquire3000 plus

### Acquisition Parameter

Ion Source Type ESI  
Mass Range Mode Std/Normal  
Capillary Exit 151.0 Volt  
Accumulation Time 42 µs

Ion Polarity Positive  
Scan Begin 200 m/z  
Skim 1 40.0 Volt  
Averages 20 Spectra

Alternating Ion Polarity off  
Scan End 2200 m/z  
Trap Drive 101.1  
Auto MS/MS off

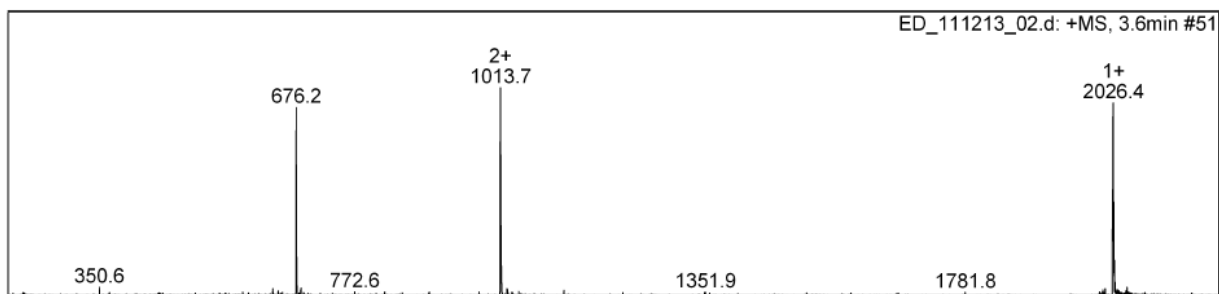

| Component | Molecular Mass | Molecule                    | Absolute Abundance | Relative Abundance |
|-----------|----------------|-----------------------------|--------------------|--------------------|
| A         | 2025.4         | 2026.7 [M + H] <sup>+</sup> | 5242157            | 100.00             |

### Component A Detail

| Actual Peak | Charge | Isotopic Mass ([M + H] <sup>+</sup> ) | Predicted Peak |
|-------------|--------|---------------------------------------|----------------|
| 1013.3      | 2+     | 2025.5                                | 1013.2         |
| 1013.7      | 2+     | 2026.4                                | 1013.7         |
| 1014.2      | 2+     | 2027.3                                | 1014.2         |
| 1014.7      | 2+     | 2028.3                                | 1014.7         |
| 1015.2      | 2+     | 2029.4                                | 1015.2         |
| 1015.6      | 2+     | 2030.3                                | 1015.7         |
| 1016.2      | 2+     | 2031.4                                | 1016.2         |
| 1016.6      | 2+     | 2032.2                                | 1016.7         |
| 2025.5      | 1+     | 2025.5                                | 2025.4         |
| 2026.4      | 1+     | 2026.4                                | 2026.4         |
| 2027.3      | 1+     | 2027.3                                | 2027.4         |
| 2028.3      | 1+     | 2028.3                                | 2028.4         |
| 2029.4      | 1+     | 2029.4                                | 2029.4         |

Molecular Mass ([M + H]<sup>+</sup>): 2025.4  
Average Mass ([M + H]<sup>+</sup>): 2026.7

Std. Deviation: 0.0918918

Compound **20**, HRMS (ESI)

For this analysis, an available solution of 20 at 500 µM in a water/DMSO mixture has been used justifying the background at low mass

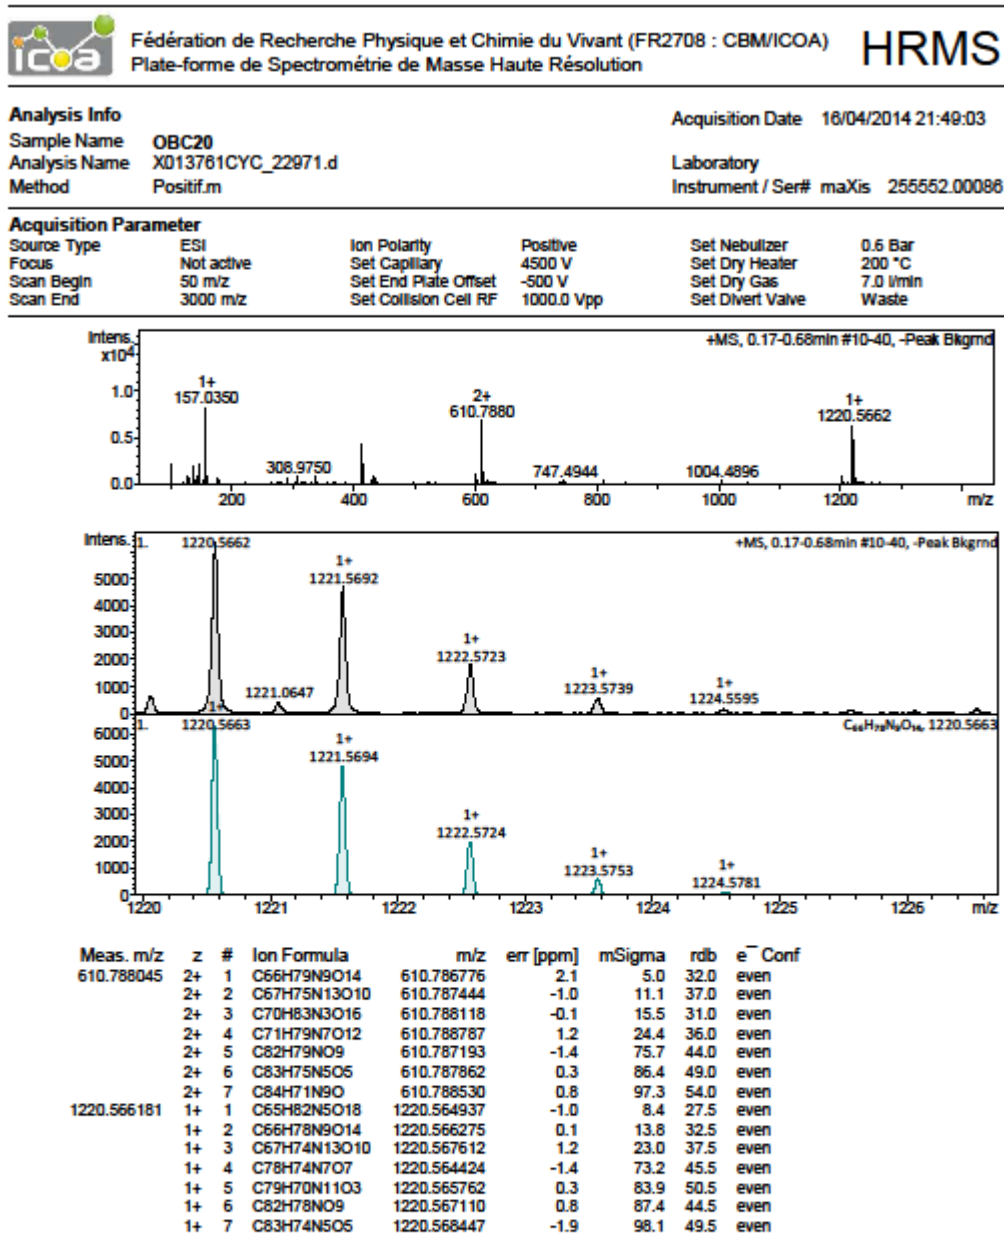

Institut de Chimie Organique et Analytique  
UMR 7311 - Université d'Orléans - CNRS  
BP 6759 - rue de Chartres - F-45067 ORLEANS Cedex 2

printed: 16/04/2014 23:08:21  
Page 1 of 1

cyril.colas@univ-orleans.fr  
+33 (0)2 38 49 46 61

Compound **20**, Mass spectra (ESI)

## Mass Spectrum Deconvolution Report

### Analysis Info

Analysis Name D:\Data\12BM\ED\_120228\_01.d  
Method Standby.m  
Sample Name emilie dufour  
Comment edufB70 tr=20.4

Acquisition Date 2/28/2012 9:27:47 AM

Operator Laure F  
Instrument esquire3000 plus

### Acquisition Parameter

|                   |            |              |            |                          |          |
|-------------------|------------|--------------|------------|--------------------------|----------|
| Ion Source Type   | ESI        | Ion Polarity | Positive   | Alternating Ion Polarity | off      |
| Mass Range Mode   | Std/Normal | Scan Begin   | 200 m/z    | Scan End                 | 1500 m/z |
| Capillary Exit    | 163.0 Volt | Skim 1       | 40.0 Volt  | Trap Drive               | 117.0    |
| Accumulation Time | 860 µs     | Averages     | 20 Spectra | Auto MS/MS               | off      |

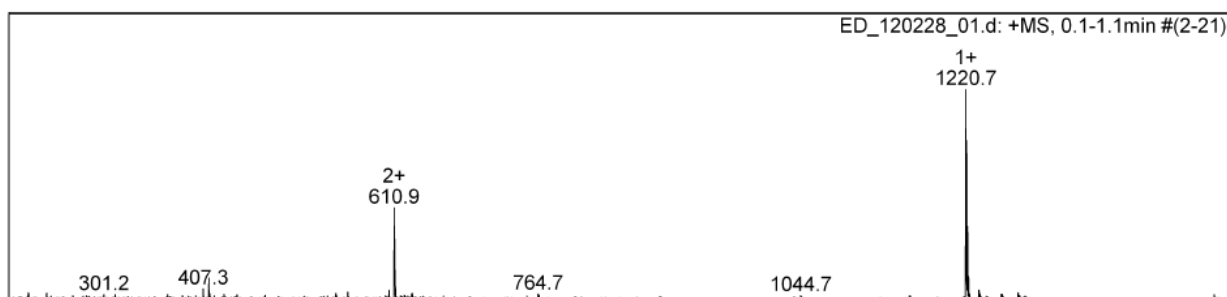

| Component | Molecular Mass | Molecule | Absolute Abundance   | Relative Abundance |
|-----------|----------------|----------|----------------------|--------------------|
| A         | 1220.7         | 1221.6   | [M + H] <sup>+</sup> | 955211             |
| B         | 413.4          | 413.8    | [M + H] <sup>+</sup> | 67748              |

### Component A Detail

| Actual Peak | Charge | Isotopic Mass ([M + H] <sup>+</sup> ) | Predicted Peak |
|-------------|--------|---------------------------------------|----------------|
| 610.9       | 2+     | 1220.8                                | 610.9          |
| 611.4       | 2+     | 1221.8                                | 611.4          |
| 611.9       | 2+     | 1222.8                                | 611.9          |
| 612.4       | 2+     | 1223.8                                | 612.4          |
| 612.8       | 2+     | 1224.7                                | 612.9          |
| 613.4       | 2+     | 1225.8                                | 613.4          |
| 1220.7      | 1+     | 1220.7                                | 1220.7         |
| 1221.7      | 1+     | 1221.7                                | 1221.7         |
| 1222.7      | 1+     | 1222.7                                | 1222.7         |
| 1223.7      | 1+     | 1223.7                                | 1223.7         |
| 1224.7      | 1+     | 1224.7                                | 1224.8         |
| 1225.7      | 1+     | 1225.7                                | 1225.8         |
| 1227.0      | 1+     | 1227.0                                | 1226.8         |

Molecular Mass ([M + H]<sup>+</sup>): 1220.7  
Average Mass ([M + H]<sup>+</sup>): 1221.6

Std. Deviation: 0.0968051

Compound **21**, HRMS (ESI)

For this analysis, an available solution of 21 at 500 µM in a water/DMSO mixture has been used justifying the background at low mass

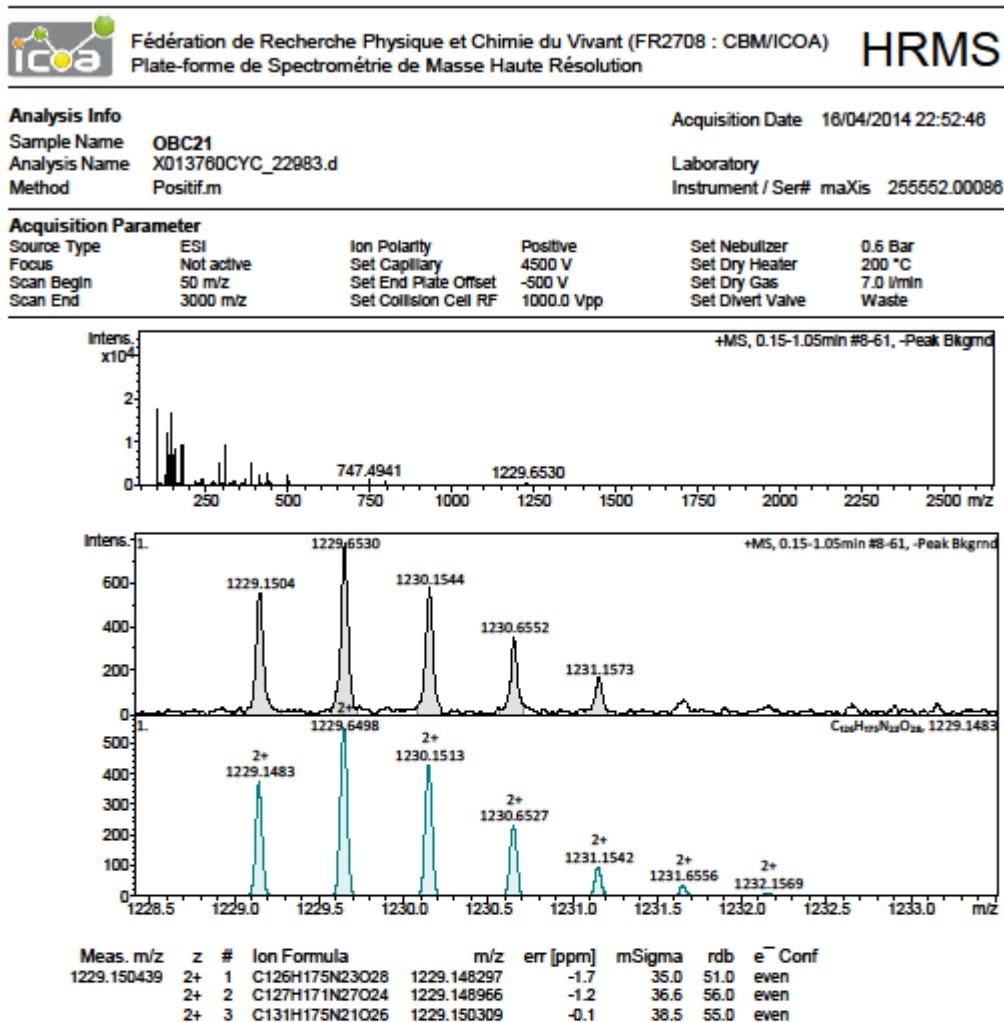

Compound **21**, Mass spectra (ESI)

## Mass Spectrum Deconvolution Report

### Analysis Info

Analysis Name D:\Data\i2bm\Dufour Emilie\_21\_01\_13559.d  
Method 13559.m  
Sample Name Dufour Emilie  
Comment edufB98 pic2(2459)  
conc hplc

Acquisition Date 6/14/2012 11:28:30 AM

Operator LF  
Instrument esquire3000 plus

### Acquisition Parameter

|                   |            |              |            |                          |          |
|-------------------|------------|--------------|------------|--------------------------|----------|
| Ion Source Type   | ESI        | Ion Polarity | Positive   | Alternating Ion Polarity | off      |
| Mass Range Mode   | Std/Normal | Scan Begin   | 400 m/z    | Scan End                 | 2500 m/z |
| Capillary Exit    | 163.0 Volt | Skim 1       | 40.0 Volt  | Trap Drive               | 122.4    |
| Accumulation Time | 746 µs     | Averages     | 20 Spectra | Auto MS/MS               | off      |

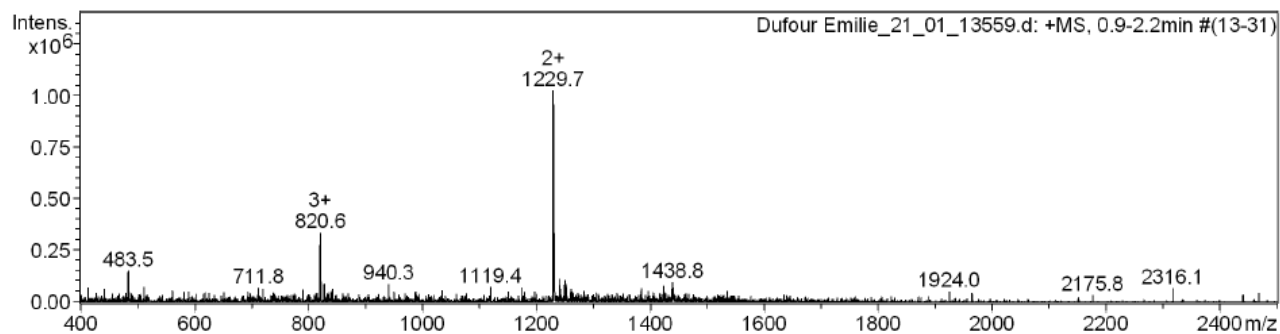

| Component | Molecular Mass | Molecule                    | Absolute Abundance | Relative Abundance |
|-----------|----------------|-----------------------------|--------------------|--------------------|
| A         | 2457.4         | 2458.9 [M + H] <sup>+</sup> | 1311460            | 100.00             |

### Component A Detail

| Actual Peak | Charge | Isotopic Mass ([M + H] <sup>+</sup> ) | Predicted Peak |
|-------------|--------|---------------------------------------|----------------|
| 820.0       | 3+     | 2458.0                                | 820.2          |
| 820.2       | 3+     | 2458.6                                | 820.2          |
| 820.6       | 3+     | 2459.7                                | 820.5          |
| 1229.2      | 2+     | 2457.4                                | 1229.2         |
| 1229.7      | 2+     | 2458.4                                | 1229.7         |
| 1230.2      | 2+     | 2459.5                                | 1230.2         |
| 1230.7      | 2+     | 2460.5                                | 1230.7         |
| 1231.1      | 2+     | 2461.3                                | 1231.2         |

Molecular Mass ([M + H]<sup>+</sup>): 2457.4      Std. Deviation: 0.202472  
Average Mass ([M + H]<sup>+</sup>): 2458.9
